# Supplementary material
Source: ML conference proceedings conference paper supplement (https://openreview.net/forum?id=9rcQibkgCg)
Supplement: supplementary_material [file attachment]

---

# Hybrid Bernstein Normalizing Flows for Flexible Multivariate Density Regression with Interpretable Marginals (Supplementary Material)

---

Marcel Arpogaus<sup>1</sup>

Thomas Kneib<sup>2</sup>

Thomas Nagler<sup>3,4</sup>

David Rügamer<sup>3,4</sup>

<sup>1</sup>Institute for Applied Research , HTWG - University of Applied Sciences , Konstanz, GERMANY

<sup>2</sup>Chair of Statistics and Campus Institute Data Science (CIDAS) , University of Göttingen , Göttingen, GERMANY

<sup>3</sup>Department of Statistics , LMU Munich, Munich, GERMANY

<sup>4</sup>Munich Center for Machine Learning (MCML) , Munich, GERMANY

## 1 MODEL DETAILS

In the following section, we provide an overview of the most important hyper parameters used to produce our results. All models are implemented using `TensorFlow` (v2.15.1) and `TensorFlow Probability` (v0.23.0) and are trained using Adam (Dillon et al., 2017; Kingma and Ba, 2017; Martín Abadi et al., 2015). The implementation is available on GitHub<sup>1</sup>.

### 1.1 SIMULATION DATA

The following tables contain all hyper parameters of the models trained on the bivariate simulation data.

---

<sup>1</sup>[https://github.com/MArpogaus/hybrid\\_flows](https://github.com/MArpogaus/hybrid_flows)

|                                        | CF (B)              |
|----------------------------------------|---------------------|
| JIT Compile                            | True                |
| Epochs                                 | 400                 |
| Batch Size                             | 512                 |
| Learning Rate Decay Steps              | epochs              |
| Initial Learning Rate                  | 0.001               |
| Learning Rate Scheduler                | cosine_decay        |
| Early Stopping                         | 50                  |
| Validation Split                       | 0.250               |
| Output Distribution                    | coupling_flow       |
| Number of Flows                        | 2                   |
| Bijector                               | BernsteinPolynomial |
| Bernstein Bijector Extrapolation       | False               |
| Bernstein Bijector Domain Min          | 0                   |
| Bernstein Bijector Domain Max          | 1                   |
| Invert Bijector                        | True                |
| Allow Flexible Bounds for Parameters   | False               |
| Bounds constraints for Parameters      | linear              |
| Nested Bernstein Bijector Codomain Min | 0                   |
| Nested Bernstein Bijector Codomain Max | 1                   |
| Number of Parameters                   | 300                 |
| Low Constraint for Layer Overwrite -2  | -5                  |
| High Constraint for Layer Overwrite -2 | 5                   |
| Low Constraint for Layer Overwrite -1  | -5                  |
| High Constraint for Layer Overwrite -1 | 5                   |
| Activation Function                    | relu                |
| Batch Normalization                    | False               |
| Dropout Rate                           | 0                   |
| First Hidden Units                     | 128                 |
| Second Hidden Units                    | 128                 |
| Third Hidden Units                     | 128                 |

Table 1: Common Hyperparameters of coupling flow (CF) (B) models trained on simulated 2D data.

| Dataset Name            | moons |       | circles |       |
|-------------------------|-------|-------|---------|-------|
|                         | True  | False | True    | False |
| Conditional             | True  | –     | True    | –     |
| Conditional Event Shape | 1     | –     | 1       | –     |

Table 2: Specific Hyperparameters of CF (B) models trained on simulated 2D data.

|                                              | CF (S)                  |
|----------------------------------------------|-------------------------|
| JIT Compile                                  | True                    |
| Epochs                                       | 400                     |
| Batch Size                                   | 512                     |
| Learning Rate Decay Steps                    | epochs                  |
| Initial Learning Rate                        | 0.001                   |
| Learning Rate Scheduler                      | cosine_decay            |
| Early Stopping                               | 50                      |
| Validation Split                             | 0.250                   |
| Output Distribution                          | coupling_flow           |
| Number of Flows                              | 2                       |
| Bijector                                     | RationalQuadraticSpline |
| Number of Parameters                         | 95                      |
| Activation Function                          | relu                    |
| Batch Normalization                          | False                   |
| Dropout Rate                                 | 0                       |
| First Hidden Units                           | 128                     |
| Second Hidden Units                          | 128                     |
| Third Hidden Units                           | 128                     |
| Spline Bijector Domain Min                   | -5                      |
| Interval Width for Nested Spline Bijector    | 10                      |
| Minimum Slope for Nested Spline Bijector     | 0.001                   |
| Minimum Bin Width for Nested Spline Bijector | 0.001                   |
| Number of Bins for Nested Spline Bijector    | 32                      |

Table 3: Common Hyperparameters of CF (S) models trained on simulated 2D data.

| Dataset Name            | moons |       | circles |       |
|-------------------------|-------|-------|---------|-------|
|                         | True  | False | True    | False |
| Conditional             | True  | –     | True    | –     |
| Conditional Event Shape | 1     | –     | 1       | –     |

Table 4: Specific Hyperparameters of CF (S) models trained on simulated 2D data.

|                                                       | HCF (B)                                  |
|-------------------------------------------------------|------------------------------------------|
| Two-Stage Training                                    | True                                     |
| First Marginal Bijector                               | BernsteinPolynomial                      |
| Invert First Marginal Bijector                        | True                                     |
| Marginal Bijector Domain Min                          | 0                                        |
| Marginal Bijector Domain Max                          | 1                                        |
| Marginal Bijector Extrapolation                       | False                                    |
| First Marginal Bijector Parameter Constraint Function | mctm.activations.get_thetas_constrain_fn |
| Allow Flexible Bounds for First Marginal Bijector     | False                                    |
| Bounds constraints for First Marginal Bijector        | linear                                   |
| First Marginal Bijector Codomain Max                  | 5                                        |
| First Marginal Bijector Codomain Min                  | -5                                       |
| First Marginal Bijector Parameter Shape 0             | 2                                        |
| First Marginal Bijector Parameter Shape 1             | 300                                      |
| First Joint Bijector                                  | RealNVP                                  |
| Parameter Shape 0 for Joint Bijector                  | 1                                        |
| Marginal Epochs                                       | 1000                                     |
| Marginal Batch Size                                   | 1024                                     |
| Marginal Learning Rate                                | 0.050                                    |
| Marginal Reduce LR on Plateau                         | False                                    |
| Marginal Early Stopping                               | 50                                       |
| Marginal Monitor                                      | val_loss                                 |
| Marginal Verbosity                                    | True                                     |
| Marginal Validation Split                             | 0.250                                    |
| Joint Epochs                                          | 400                                      |
| Joint Batch Size                                      | 512                                      |
| Joint Learning Rate Decay Steps                       | epochs                                   |
| Joint Initial Learning Rate                           | 0.001                                    |
| Joint Learning Rate Scheduler                         | cosine_decay                             |
| Joint Early Stopping                                  | 50                                       |
| Joint Validation Split                                | 0.250                                    |
| Masked Dimensions                                     | 1                                        |
| First Nested Bijector                                 | BernsteinPolynomial                      |
| Invert Nested Bijector                                | True                                     |
| Nested Bernstein Bijector Domain Min                  | -5                                       |
| Nested Bernstein Bijector Domain Max                  | 5                                        |
| Nested Bernstein Bijector Extrapolation               | False                                    |
| Nested Bijector Parameter Constraint Function         | mctm.activations.get_thetas_constrain_fn |
| Bounds constraints of Nested Bernstein Bijector       | linear                                   |
| Nested Bernstein Bijector Codomain Max                | 5                                        |
| Nested Bernstein Bijector Codomain Min                | -5                                       |
| Activation Function for Joint Bijector                | relu                                     |
| Batch Normalization for Joint Bijector                | False                                    |
| Dropout Rate for Joint Bijector                       | False                                    |
| First Hidden Units for Joint Bijector                 | 512                                      |
| Input Shape 0 for Joint Bijector                      | 1                                        |

Table 5: Common Hyperparameters of hybrid CF (HCF) (B) models trained on simulated 2D data.

| Dataset Name                                    | moons                |                  | circles              |                  |
|-------------------------------------------------|----------------------|------------------|----------------------|------------------|
| Conditional                                     | True                 | False            | True                 | False            |
| JIT Compile                                     | True                 | False            | True                 | False            |
| Parameters Function for First Marginal Bijector | bernstein_polynomial | parameter_vector | bernstein_polynomial | parameter_vector |
| Joint Bijector Conditional Event Shape          | 1                    | –                | 1                    | –                |
| Extrapolation for First Marginal Bijector       | True                 | –                | True                 | –                |
| First Marginal Bijector Conditional Event Shape | 1                    | –                | 1                    | –                |
| Polynomial Order for First Marginal Bijector    | 1                    | –                | 1                    | –                |
| Second Hidden Units for Joint Bijector          | 32                   | 128              | 512                  | 32               |
| Third Hidden Units for Joint Bijector           | 512                  | 1024             | 32                   | 1024             |
| Parameter Shape 1 for Joint Bijector            | 300                  | 2000             | 1500                 | 1500             |
| Is Conditional for Joint Bijector               | True                 | –                | True                 | –                |

Table 6: Specific Hyperparameters of HCF (B) models trained on simulated 2D data.

|                                                       | HCF (S)                                  |
|-------------------------------------------------------|------------------------------------------|
| Two-Stage Training                                    | True                                     |
| First Marginal Bijector                               | BernsteinPolynomial                      |
| Invert First Marginal Bijector                        | True                                     |
| Marginal Bijector Domain Min                          | 0                                        |
| Marginal Bijector Domain Max                          | 1                                        |
| Marginal Bijector Extrapolation                       | False                                    |
| First Marginal Bijector Parameter Constraint Function | mctm.activations.get_thetas_constrain_fn |
| Allow Flexible Bounds for First Marginal Bijector     | False                                    |
| Bounds constraints for First Marginal Bijector        | linear                                   |
| First Marginal Bijector Codomain Max                  | 5                                        |
| First Marginal Bijector Codomain Min                  | -5                                       |
| First Marginal Bijector Parameter Shape 0             | 2                                        |
| First Marginal Bijector Parameter Shape 1             | 300                                      |
| First Joint Bijector                                  | RealNVP                                  |
| Parameter Shape 0 for Joint Bijector                  | 1                                        |
| Marginal Epochs                                       | 1000                                     |
| Marginal Batch Size                                   | 1024                                     |
| Marginal Learning Rate                                | 0.050                                    |
| Marginal Reduce LR on Plateau                         | False                                    |
| Marginal Early Stopping                               | 50                                       |
| Marginal Monitor                                      | val_loss                                 |
| Marginal Verbosity                                    | True                                     |
| Marginal Validation Split                             | 0.250                                    |
| Joint Epochs                                          | 400                                      |
| Joint Batch Size                                      | 512                                      |
| Joint Learning Rate Decay Steps                       | epochs                                   |
| Joint Initial Learning Rate                           | 0.001                                    |
| Joint Learning Rate Scheduler                         | cosine_decay                             |
| Joint Early Stopping                                  | 50                                       |
| Joint Validation Split                                | 0.250                                    |
| Masked Dimensions                                     | 1                                        |
| First Nested Bijector                                 | RationalQuadraticSpline                  |
| Activation Function for Joint Bijector                | relu                                     |
| Batch Normalization for Joint Bijector                | False                                    |
| Dropout Rate for Joint Bijector                       | False                                    |
| First Hidden Units for Joint Bijector                 | 128                                      |
| Second Hidden Units for Joint Bijector                | 128                                      |
| Third Hidden Units for Joint Bijector                 | 128                                      |
| Input Shape 0 for Joint Bijector                      | 1                                        |
| Parameter Shape 1 for Joint Bijector                  | 95                                       |
| Nested Spline Bijector Range Min                      | -5                                       |
| Interval Width for Nested Spline Bijector             | 10                                       |
| Minimum Slope for Nested Spline Bijector              | 0.001                                    |
| Minimum Bin Width for Nested Spline Bijector          | 0.001                                    |
| Number of Bins for Nested Spline Bijector             | 32                                       |

Table 7: Common Hyperparameters of HCF (S) models trained on simulated 2D data.

| Dataset Name                                    | moons                |                  | circles              |                  |
|-------------------------------------------------|----------------------|------------------|----------------------|------------------|
| Conditional                                     | True                 | False            | True                 | False            |
| JIT Compile                                     | True                 | False            | True                 | False            |
| Parameters Function for First Marginal Bijector | bernstein_polynomial | parameter_vector | bernstein_polynomial | parameter_vector |
| Joint Bijector Conditional Event Shape          | 1                    | –                | 1                    | –                |
| Extrapolation for First Marginal Bijector       | True                 | –                | True                 | –                |
| First Marginal Bijector Conditional Event Shape | 1                    | –                | 1                    | –                |
| Polynomial Order for First Marginal Bijector    | 1                    | –                | 1                    | –                |
| Is Conditional for Joint Bijector               | True                 | –                | True                 | –                |

Table 8: Specific Hyperparameters of HCF (S) models trained on simulated 2D data.

|                                        | MAF (B)                    |
|----------------------------------------|----------------------------|
| JIT Compile                            | False                      |
| Epochs                                 | 400                        |
| Batch Size                             | 512                        |
| Learning Rate Decay Steps              | epochs                     |
| Initial Learning Rate                  | 0.001                      |
| Learning Rate Scheduler                | cosine_decay               |
| Early Stopping                         | 50                         |
| Validation Split                       | 0.250                      |
| Output Distribution                    | masked_autoregressive_flow |
| Number of Flows                        | 2                          |
| Bijector                               | BernsteinPolynomial        |
| Bernstein Bijector Extrapolation       | False                      |
| Bernstein Bijector Domain Min          | -5                         |
| Bernstein Bijector Domain Max          | 5                          |
| Invert Bijector                        | True                       |
| Allow Flexible Bounds for Parameters   | False                      |
| Bounds constraints for Parameters      | linear                     |
| Nested Bernstein Bijector Codomain Min | -5                         |
| Nested Bernstein Bijector Codomain Max | 5                          |
| Number of Parameters                   | 128                        |
| Activation Function                    | relu                       |
| First Hidden Units                     | 128                        |
| Second Hidden Units                    | 128                        |
| Third Hidden Units                     | 128                        |
| Layer Overwrite 0 Domain Min           | 0                          |
| Layer Overwrite 0 Domain Max           | 1                          |

Table 9: Common Hyperparameters of masked autoregressive flow (MAF) (B) models trained on simulated 2D data.

| Dataset Name            | moons |       | circles |       |
|-------------------------|-------|-------|---------|-------|
| Conditional             | True  | False | True    | False |
| Conditional             | True  | –     | True    | –     |
| Conditional Event Shape | 1     | –     | 1       | –     |

Table 10: Specific Hyperparameters of MAF (B) models trained on simulated 2D data.

|                                              | MAF (S)                    |
|----------------------------------------------|----------------------------|
| JIT Compile                                  | False                      |
| Epochs                                       | 400                        |
| Batch Size                                   | 512                        |
| Learning Rate Decay Steps                    | epochs                     |
| Initial Learning Rate                        | 0.001                      |
| Learning Rate Scheduler                      | cosine_decay               |
| Early Stopping                               | 50                         |
| Validation Split                             | 0.250                      |
| Output Distribution                          | masked_autoregressive_flow |
| Number of Flows                              | 2                          |
| Bijector                                     | RationalQuadraticSpline    |
| Number of Parameters                         | 95                         |
| Activation Function                          | relu                       |
| First Hidden Units                           | 128                        |
| Second Hidden Units                          | 128                        |
| Third Hidden Units                           | 128                        |
| Spline Bijector Domain Min                   | -5                         |
| Interval Width for Nested Spline Bijector    | 10                         |
| Minimum Slope for Nested Spline Bijector     | 0.001                      |
| Minimum Bin Width for Nested Spline Bijector | 0.001                      |
| Number of Bins for Nested Spline Bijector    | 32                         |

Table 11: Common Hyperparameters of MAF (S) models trained on simulated 2D data.

| Dataset Name            | moons |       | circles |       |
|-------------------------|-------|-------|---------|-------|
|                         | True  | False | True    | False |
| Conditional             | True  | –     | True    | –     |
| Conditional Event Shape | 1     | –     | 1       | –     |

Table 12: Specific Hyperparameters of MAF (S) models trained on simulated 2D data.



|                                                       | MCTM                                     |
|-------------------------------------------------------|------------------------------------------|
| Epochs                                                | 100                                      |
| Batch Size                                            | 512                                      |
| Learning Rate Decay Steps                             | 100                                      |
| Initial Learning Rate                                 | 0.010                                    |
| Learning Rate Scheduler                               | cosine_decay                             |
| Validation Split                                      | 0.250                                    |
| Two-Stage Training                                    | True                                     |
| First Marginal Bijector                               | BernsteinPolynomial                      |
| Invert First Marginal Bijector                        | True                                     |
| Marginal Bijector Domain Min                          | 0                                        |
| Marginal Bijector Domain Max                          | 1                                        |
| Marginal Bijector Extrapolation                       | True                                     |
| First Marginal Bijector Parameter Constraint Function | mctm.activations.get_thetas_constrain_fn |
| Allow Flexible Bounds for First Marginal Bijector     | False                                    |
| Bounds constraints for First Marginal Bijector        | smooth                                   |
| First Marginal Bijector Codomain Max                  | 4                                        |
| First Marginal Bijector Codomain Min                  | -4                                       |
| Parameters Function for First Marginal Bijector       | parameter_vector                         |
| First Marginal Bijector Parameter Shape 0             | 2                                        |
| First Marginal Bijector Parameter Shape 1             | 300                                      |
| First Joint Bijector                                  | ScaleMatvecLinearOperator                |
| Invert First Joint Bijector                           | True                                     |
| Parameter Shape 0 for Joint Bijector                  | 1                                        |

Table 13: Common Hyperparameters of multivariate conditional transformation model (MCTM) models trained on simulated 2D data.

| Dataset Name                                     | moons                |       | circles              |       |
|--------------------------------------------------|----------------------|-------|----------------------|-------|
| Conditional                                      | True                 | False | True                 | False |
| Early Stopping                                   | False                | False | 30                   | False |
| Second Marginal Bijector                         | Shift                | –     | Shift                | –     |
| Invert Second Marginal Bijector                  | True                 | –     | True                 | –     |
| Parameters Function for Second Marginal Bijector | bernstein_polynomial | –     | bernstein_polynomial | –     |
| Second Marginal Bijector Conditional Event Shape | 1                    | –     | 1                    | –     |
| Extrapolation for Second Marginal Bijector       | True                 | –     | True                 | –     |
| Second Marginal Bijector Parameter Shape 0       | 2                    | –     | 2                    | –     |
| Polynomial Order for Second Marginal Bijector    | 6                    | –     | 6                    | –     |
| Joint Bijector Conditional Event Shape           | 1                    | –     | 1                    | –     |
| Extrapolation for Joint Bijector                 | True                 | –     | True                 | –     |
| Polynomial Order for Joint Bijector              | 3                    | –     | 3                    | –     |
| Parameter Shape 1 for Joint Bijector             | –                    | 1     | –                    | 1     |

Table 14: Specific Hyperparameters of MCTM models trained on simulated 2D data.

|                           | MVN                 |
|---------------------------|---------------------|
| JIT Compile               | False               |
| Epochs                    | 200                 |
| Batch Size                | 256                 |
| Learning Rate Decay Steps | 200                 |
| Initial Learning Rate     | 0.010               |
| Learning Rate Scheduler   | cosine_decay        |
| Early Stopping            | False               |
| Validation Split          | 0.100               |
| Output Distribution       | multivariate_normal |

Table 15: Common Hyperparameters of multivariate normal (MVN) models trained on simulated 2D data.

| Dataset Name            | moons |       | circles |       |
|-------------------------|-------|-------|---------|-------|
|                         | True  | False | True    | False |
| Activation Function     | relu  | –     | relu    | –     |
| Batch Normalization     | True  | –     | True    | –     |
| Dropout Rate            | 0     | –     | 0       | –     |
| First Hidden Units      | 16    | –     | 16      | –     |
| Second Hidden Units     | 16    | –     | 16      | –     |
| Conditional             | True  | False | True    | False |
| Conditional Event Shape | 1     | –     | 1       | –     |

Table 16: Specific Hyperparameters of MVN models trained on simulated 2D data.

## 1.2 BENCHMARK DATA

The following tables contain all hyper parameters of the models trained on the multivariate benchmark data.

|                                                       | HMAF (S)                                    |
|-------------------------------------------------------|---------------------------------------------|
| Two-Stage Training                                    | True                                        |
| First Marginal Bijector                               | BernsteinPolynomial                         |
| Invert First Marginal Bijector                        | True                                        |
| Marginal Bijector Extrapolation                       | True                                        |
| First Marginal Bijector Parameter Constraint Function | mctm.activations.get_thetas_constrain_fn    |
| Allow Flexible Bounds for First Marginal Bijector     | False                                       |
| Bounds constraints for First Marginal Bijector        | smooth                                      |
| First Marginal Bijector Codomain Max                  | 4                                           |
| First Marginal Bijector Codomain Min                  | -4                                          |
| Parameters Function for First Marginal Bijector       | parameter_vector                            |
| First Marginal Bijector Parameter Shape 1             | 2048                                        |
| Marginal Reduce LR on Plateau                         | False                                       |
| Marginal Early Stopping                               | 30                                          |
| Marginal Monitor                                      | val_loss                                    |
| Marginal Verbosity                                    | True                                        |
| Joint Epochs                                          | 200                                         |
| Joint Learning Rate Decay Steps                       | 200                                         |
| Joint Learning Rate Scheduler                         | cosine_decay                                |
| Joint Early Stopping                                  | 30                                          |
| Type of Joint Flow                                    | masked_autoregressive_flow_first_dim_masked |
| Number of Flows                                       | 10                                          |
| Use Invertible Linear Transformations                 | True                                        |
| Random Permutation Seed                               | 1                                           |
| Joint Bijector                                        | RationalQuadraticSpline                     |
| Joint Bijector Range Min                              | -4                                          |
| Interval Width for Joint Bijector                     | 8                                           |
| Minimum Slope for Joint Bijector                      | 0.001                                       |
| Minimum Bin Width for Joint Bijector                  | 0.001                                       |
| Number of Bins for Joint Bijector                     | 8                                           |
| Number of Parameters for Joint Bijectors              | 23                                          |
| Activation Function for MAF                           | relu                                        |
| Activation Function for X0 Parameters                 | relu                                        |
| Batch Normalization for X0 Parameters                 | False                                       |
| Dropout Rate for X0 Parameters                        | False                                       |

Table 17: Common Hyperparameters of hybrid MAF (HMAF) (S) models trained on benchmark data.

| Dataset Name                              | bsds300 | gas   | hepmass | miniboone | power |
|-------------------------------------------|---------|-------|---------|-----------|-------|
| Conditional                               | False   | False | False   | False     | False |
| First Marginal Bijector Parameter Shape 0 | 63      | 8     | 21      | 43        | 6     |
| Marginal Epochs                           | 1000    | 1000  | 2000    | 2000      | 1000  |
| Marginal Batch Size                       | 16384   | 16384 | 16384   | 512       | 16384 |
| Marginal Learning Rate                    | 0.100   | 0.100 | 0.100   | 0.010     | 0.100 |
| Joint Batch Size                          | 4096    | 4096  | 4096    | 512       | 4096  |
| Joint Initial Learning Rate               | 0.001   | 0.001 | 0.001   | 0.001     | 0.001 |
| First Hidden Units for MAF                | 512     | 512   | 64      | 64        | 256   |
| Second Hidden Units for MAF               | 512     | 512   | 64      | 64        | 256   |
| First Hidden Units for X0 Network         | 512     | 512   | 64      | 64        | 256   |
| Second Hidden Units for X0 Network        | 512     | 512   | 64      | 64        | 256   |

Table 18: Specific Hyperparameters of HMAF (S) models trained on benchmark data.

|                                              | MAF (S)                    |
|----------------------------------------------|----------------------------|
| Epochs                                       | 200                        |
| Learning Rate Decay Steps                    | 200                        |
| Learning Rate Scheduler                      | cosine_decay               |
| Early Stopping                               | 30                         |
| Output Distribution                          | masked_autoregressive_flow |
| Number of Flows                              | 10                         |
| Bijector                                     | RationalQuadraticSpline    |
| Activation Function                          | relu                       |
| Spline Bijector Domain Min                   | -3                         |
| Interval Width for Nested Spline Bijector    | 6                          |
| Minimum Slope for Nested Spline Bijector     | 0.001                      |
| Minimum Bin Width for Nested Spline Bijector | 0.001                      |
| Use Invertible Linear Transformations        | True                       |

Table 19: Common Hyperparameters of MAF (S) models trained on benchmark data.

| Dataset Name                              | bsds300 | gas   | hepmass | miniboone | power |
|-------------------------------------------|---------|-------|---------|-----------|-------|
| Conditional                               | False   | False | False   | False     | False |
| Batch Size                                | 4096    | 4096  | 4096    | 512       | 4096  |
| Initial Learning Rate                     | 0.001   | 0.001 | 0.001   | 0.000     | 0.001 |
| Number of Parameters                      | 23      | 23    | 23      | 11        | 11    |
| First Hidden Units                        | 512     | 256   | 64      | 64        | 512   |
| Second Hidden Units                       | 512     | 256   | 64      | 64        | 512   |
| Number of Bins for Nested Spline Bijector | 8       | 8     | 8       | 4         | 4     |

Table 20: Specific Hyperparameters of MAF (S) models trained on benchmark data.

## 2 MALNUTRITION DATA

The following tables contain all hyper parameters of the models trained on the trivariate malnutrition data.

|                                                       | malnutrition                             |
|-------------------------------------------------------|------------------------------------------|
| Two-Stage Training                                    | True                                     |
| First Marginal Bijector                               | BernsteinPolynomial                      |
| Invert First Marginal Bijector                        | True                                     |
| Marginal Bijector Domain Min                          | -5                                       |
| Marginal Bijector Domain Max                          | 5                                        |
| Marginal Bijector Extrapolation                       | True                                     |
| First Marginal Bijector Parameter Constraint Function | mctm.activations.get_thetas_constrain_fn |
| Allow Flexible Bounds for First Marginal Bijector     | False                                    |
| Bounds constraints for First Marginal Bijector        | linear                                   |
| First Marginal Bijector Codomain Max                  | 5                                        |
| First Marginal Bijector Codomain Min                  | -5                                       |
| Parameters Function for First Marginal Bijector       | parameter_vector                         |
| First Marginal Bijector Parameter Shape 0             | 3                                        |
| First Marginal Bijector Parameter Shape 1             | 6                                        |
| Second Marginal Bijector                              | Shift                                    |
| Invert Second Marginal Bijector                       | True                                     |
| Parameters Function for Second Marginal Bijector      | bernstein_polynomial                     |
| Second Marginal Bijector Conditional Event Shape      | 1                                        |
| Extrapolation for Second Marginal Bijector            | True                                     |
| Second Marginal Bijector Parameter Shape 0            | 3                                        |
| Polynomial Order for Second Marginal Bijector         | 6                                        |
| Marginal Epochs                                       | 1000                                     |
| Marginal Batch Size                                   | 1024                                     |
| Marginal Learning Rate                                | 0.050                                    |
| Marginal Reduce LR on Plateau                         | False                                    |
| Marginal Early Stopping                               | 50                                       |
| Marginal Monitor                                      | val_loss                                 |
| Marginal Verbosity                                    | True                                     |
| Joint Epochs                                          | 400                                      |
| Joint Batch Size                                      | 512                                      |
| Joint Learning Rate Decay Steps                       | epochs                                   |
| Joint Learning Rate Scheduler                         | cosine_decay                             |
| Joint Early Stopping                                  | 50                                       |
| Second Marginal Bijector Domain Min                   | 0                                        |
| Second Marginal Bijector Domain Max                   | 35                                       |

Table 21: Common Hyperparameters of models trained on malnutrition data.

| Model                                    | MCTM                      | HMAF (B)                                    | HMAF (S)                                    |
|------------------------------------------|---------------------------|---------------------------------------------|---------------------------------------------|
| JIT Compile                              | –                         | True                                        | True                                        |
| First Joint Bijector                     | ScaleMatvecLinearOperator | –                                           | –                                           |
| Invert First Joint Bijector              | True                      | –                                           | –                                           |
| Joint Bijector Conditional Event Shape   | 1                         | –                                           | –                                           |
| Extrapolation for Joint Bijector         | True                      | –                                           | –                                           |
| Parameter Shape 0 for Joint Bijector     | 3                         | –                                           | –                                           |
| Polynomial Order for Joint Bijector      | 6                         | –                                           | –                                           |
| Joint Initial Learning Rate              | 0.001                     | 0.001                                       | 0.001                                       |
| Type of Joint Flow                       | –                         | masked_autoregressive_flow_first_dim_masked | masked_autoregressive_flow_first_dim_masked |
| Number of Flows                          | –                         | 1                                           | 1                                           |
| Joint Bijector                           | –                         | BernsteinPolynomial                         | RationalQuadraticSpline                     |
| Joint Bijector Range Min                 | –                         | –                                           | -5                                          |
| Interval Width for Joint Bijector        | –                         | –                                           | 10                                          |
| Minimum Slope for Joint Bijector         | –                         | –                                           | 0.001                                       |
| Minimum Bin Width for Joint Bijector     | –                         | –                                           | 0.001                                       |
| Number of Bins for Joint Bijector        | –                         | –                                           | 16                                          |
| Number of Parameters for Joint Bijectors | –                         | 32                                          | 47                                          |
| Activation Function for MAF              | –                         | relu                                        | relu                                        |
| First Hidden Units for MAF               | –                         | 512                                         | 512                                         |
| Second Hidden Units for MAF              | –                         | 512                                         | 512                                         |
| Activation Function for X0 Parameters    | –                         | relu                                        | relu                                        |
| Batch Normalization for X0 Parameters    | –                         | False                                       | False                                       |
| Dropout Rate for X0 Parameters           | –                         | False                                       | False                                       |
| First Hidden Units for X0 Network        | –                         | 512                                         | 512                                         |
| Second Hidden Units for X0 Network       | –                         | 512                                         | 512                                         |
| Nested Bernstein Bijector Domain Min     | 0                         | –                                           | –                                           |
| Nested Bernstein Bijector Domain Max     | 35                        | –                                           | –                                           |
| Joint Bijector Extrapolation             | –                         | False                                       | –                                           |
| Nested Bernstein Bijector Domain Min     | –                         | -5                                          | –                                           |
| Nested Bernstein Bijector Domain Max     | –                         | 5                                           | –                                           |
| Invert Joint Bijector                    | –                         | True                                        | –                                           |
| Joint Bijector Codomain Min              | –                         | -5                                          | –                                           |
| Joint Bijector Codomain Max              | –                         | 5                                           | –                                           |
| Third Hidden Units for MAF               | –                         | 512                                         | 512                                         |
| Is Conditional for MAF                   | –                         | True                                        | True                                        |
| MAF Conditional Event Shape              | –                         | 1                                           | 1                                           |
| Third Hidden Units for X0 Network        | –                         | 512                                         | 512                                         |
| Is Conditional for X0 Parameters         | –                         | True                                        | True                                        |
| X0 Parameters Conditional Event Shape    | –                         | 1                                           | 1                                           |

Table 22: Specific Hyperparameters of models trained on malnutrition data.

### 3 DESCRIPTION OF HYPERPARAMETERS

The following table gives a brief description of the hyperparameters and maps their table names to the canonical path inside the configurations files in the git repository<sup>2</sup>.

| Table Name                           | Parameter / Description                                                                                                  |
|--------------------------------------|--------------------------------------------------------------------------------------------------------------------------|
| JIT Compile                          | compile_kwargs.jit_compile<br>Defines whether to compile the model using Just-In-Time compilation for performance        |
| Epochs                               | fit_kwargs.epochs<br>Maximum number of epochs                                                                            |
| Batch Size                           | fit_kwargs.batch_size<br>Batch size used for training                                                                    |
| Learning Rate Decay Steps            | fit_kwargs.learning_rate.scheduler_kwargs.decay_steps<br>Steps after which to decay the learning rate with the scheduler |
| Initial Learning Rate                | fit_kwargs.learning_rate.scheduler_kwargs.initial_learning_rate<br>Initial learning rate for the learning rate scheduler |
| Learning Rate Scheduler              | fit_kwargs.learning_rate.scheduler_name<br>Name of the learning rate scheduler                                           |
| Early Stopping                       | fit_kwargs.early_stopping<br>Enable early stopping                                                                       |
| Validation Split                     | fit_kwargs.validation_split<br>Fraction of training data to be used as validation data                                   |
| Output Distribution                  | model_kwargs.distribution<br>Specifies the type of output distribution used in the model                                 |
| Number of Flows                      | model_kwargs.num_layers<br>Total number of layers in the model                                                           |
| Bijector                             | model_kwargs.bijector<br>Specifies the bijector type to be used in the model                                             |
| Bernstein Bijector Extrapolation     | model_kwargs.bijector_kwargs.extrapolation<br>Defines whether to allow extrapolation in the bijector                     |
| Bernstein Bijector Domain Min        | model_kwargs.bijector_kwargs.domain.0<br>Lower bound of the Bernstein polynomial bijector domain                         |
| Bernstein Bijector Domain Max        | model_kwargs.bijector_kwargs.domain.1<br>Upper bound of the Bernstein polynomial bijector domain                         |
| Invert Bijector                      | model_kwargs.invert<br>Indicates if the bijector should be inverted                                                      |
| Allow Flexible Bounds for Parameters | model_kwargs.parameters_constraint_fn_kwargs.allow_flexible_bounds                                                       |

Continued on next page

<sup>2</sup>[https://github.com/MArpogaus/hybrid\\_flows](https://github.com/MArpogaus/hybrid_flows)

| Table Name                             | Parameter / Description                                                                                                        |
|----------------------------------------|--------------------------------------------------------------------------------------------------------------------------------|
|                                        | Defines if flexible bounds are allowed for the parameters                                                                      |
| Bounds constraints for Parameters      | model_kwargs.parameters_constraint_fn_kwargs.bounds<br>Defining the type of constraints on the bounds for the parameters       |
| Nested Bernstein Bijector Codomain Min | model_kwargs.parameters_constraint_fn_kwargs.low<br>Defines the lower bound for the corresponding parameters                   |
| Nested Bernstein Bijector Codomain Max | model_kwargs.parameters_constraint_fn_kwargs.high<br>Defines the upper bound for the corresponding parameters                  |
| Number of Parameters                   | model_kwargs.num_parameters<br>Total number of parameters in the model                                                         |
| Low Constraint for Layer Overwrite -2  | model_kwargs.layer_overwrites.-2.parameters_constraint_fn_kwargs.low<br>Lower constraint for parameters in layer overwrite -2  |
| High Constraint for Layer Overwrite -2 | model_kwargs.layer_overwrites.-2.parameters_constraint_fn_kwargs.high<br>Upper constraint for parameters in layer overwrite -2 |
| Low Constraint for Layer Overwrite -1  | model_kwargs.layer_overwrites.-1.parameters_constraint_fn_kwargs.low<br>Lower constraint for parameters in layer overwrite -1  |
| High Constraint for Layer Overwrite -1 | model_kwargs.layer_overwrites.-1.parameters_constraint_fn_kwargs.high<br>Upper constraint for parameters in layer overwrite -1 |
| Activation Function                    | model_kwargs.parameters_fn_kwargs.activation<br>Activation function of the used neural network                                 |
| Batch Normalization                    | model_kwargs.parameters_fn_kwargs.batch_norm<br>Specifies if batch normalization should be enabled in the used neural network  |
| Dropout Rate                           | model_kwargs.parameters_fn_kwargs.dropout<br>Dropout rate for the neural network                                               |
| First Hidden Units                     | model_kwargs.parameters_fn_kwargs.hidden_units.0<br>Number of units in the first hidden layer of the neural network            |
| Second Hidden Units                    | model_kwargs.parameters_fn_kwargs.hidden_units.1<br>Number of units in the second hidden layer of the neural network           |
| Third Hidden Units                     | model_kwargs.parameters_fn_kwargs.hidden_units.2<br>Number of units in the third hidden layer of the neural network            |
| Conditional                            | model_kwargs.parameters_fn_kwargs.conditional<br>Indicates if the parameter functions should get the covariates as input       |
| Conditional Event Shape                | model_kwargs.parameters_fn_kwargs.conditional_event_shape<br>Shape of the covariate vector                                     |
| JIT Compile                            | compile_kwargs.jit_compile<br>Defines whether to compile the model using Just-In-Time compilation for performance              |
| Epochs                                 | fit_kwargs.epochs<br>Maximum number of epochs                                                                                  |

Continued on next page



| Table Name                                | Parameter / Description                                                                                                       |
|-------------------------------------------|-------------------------------------------------------------------------------------------------------------------------------|
| Batch Size                                | fit_kwargs.batch_size<br>Batch size used for training                                                                         |
| Learning Rate Decay Steps                 | fit_kwargs.learning_rate.scheduler_kwargs.decay_steps<br>Steps after which to decay the learning rate with the scheduler      |
| Initial Learning Rate                     | fit_kwargs.learning_rate.scheduler_kwargs.initial_learning_rate<br>Initial learning rate for the learning rate scheduler      |
| Learning Rate Scheduler                   | fit_kwargs.learning_rate.scheduler_name<br>Name of the learning rate scheduler                                                |
| Early Stopping                            | fit_kwargs.early_stopping<br>Enable early stopping                                                                            |
| Validation Split                          | fit_kwargs.validation_split<br>Fraction of training data to be used as validation data                                        |
| Output Distribution                       | model_kwargs.distribution<br>Specifies the type of output distribution used in the model                                      |
| Number of Flows                           | model_kwargs.num_layers<br>Total number of layers in the model                                                                |
| Bijector                                  | model_kwargs.bijector<br>Specifies the bijector type to be used in the model                                                  |
| Number of Parameters                      | model_kwargs.num_parameters<br>Total number of parameters in the model                                                        |
| Activation Function                       | model_kwargs.parameters_fn_kwargs.activation<br>Activation function of the used neural network                                |
| Batch Normalization                       | model_kwargs.parameters_fn_kwargs.batch_norm<br>Specifies if batch normalization should be enabled in the used neural network |
| Dropout Rate                              | model_kwargs.parameters_fn_kwargs.dropout<br>Dropout rate for the neural network                                              |
| First Hidden Units                        | model_kwargs.parameters_fn_kwargs.hidden_units.0<br>Number of units in the first hidden layer of the neural network           |
| Second Hidden Units                       | model_kwargs.parameters_fn_kwargs.hidden_units.1<br>Number of units in the second hidden layer of the neural network          |
| Third Hidden Units                        | model_kwargs.parameters_fn_kwargs.hidden_units.2<br>Number of units in the third hidden layer of the neural network           |
| Spline Bijector Domain Min                | model_kwargs.bijector_kwargs.range_min<br>Lower bound of the quadratic spline bijector domain                                 |
| Interval Width for Nested Spline Bijector | model_kwargs.parameters_constraint_fn_kwargs.interval_width<br>Specifies the interval width for constraint parameters         |
| Minimum Slope for Nested Spline Bijector  | model_kwargs.parameters_constraint_fn_kwargs.min_slope                                                                        |

Continued on next page

| Table Name                                   | Parameter / Description                                                                                                    |
|----------------------------------------------|----------------------------------------------------------------------------------------------------------------------------|
|                                              | Defines the minimum slope constraint for parameters                                                                        |
| Minimum Bin Width for Nested Spline Bijector | model_kwargs.parameters_constraint_fn_kwargs.min_bin_width<br>Defines the minimum bin width for the nested Spline bijector |
| Number of Bins for Nested Spline Bijector    | model_kwargs.parameters_constraint_fn_kwargs.nbins<br>Defines the number of bins used by the nested bijector               |
| Conditional                                  | model_kwargs.parameters_fn_kwargs.conditional<br>Indicates if the parameter functions should get the covariates as input   |
| Conditional Event Shape                      | model_kwargs.parameters_fn_kwargs.conditional_event_shape<br>Shape of the covariate vector                                 |
| JIT Compile                                  | compile_kwargs.jit_compile<br>Defines whether to compile the model using Just-In-Time compilation for performance          |
| Epochs                                       | fit_kwargs.epochs<br>Maximum number of epochs                                                                              |
| Batch Size                                   | fit_kwargs.batch_size<br>Batch size used for training                                                                      |
| Learning Rate Decay Steps                    | fit_kwargs.learning_rate.scheduler_kwargs.decay_steps<br>Steps after which to decay the learning rate with the scheduler   |
| Initial Learning Rate                        | fit_kwargs.learning_rate.scheduler_kwargs.initial_learning_rate<br>Initial learning rate for the learning rate scheduler   |
| Learning Rate Scheduler                      | fit_kwargs.learning_rate.scheduler_name<br>Name of the learning rate scheduler                                             |
| Early Stopping                               | fit_kwargs.early_stopping<br>Enable early stopping                                                                         |
| Validation Split                             | fit_kwargs.validation_split<br>Fraction of training data to be used as validation data                                     |
| Output Distribution                          | model_kwargs.distribution<br>Specifies the type of output distribution used in the model                                   |
| Number of Flows                              | model_kwargs.num_layers<br>Total number of layers in the model                                                             |
| Bijector                                     | model_kwargs.bijector<br>Specifies the bijector type to be used in the model                                               |
| Bernstein Bijector Extrapolation             | model_kwargs.bijector_kwargs.extrapolation<br>Defines whether to allow extrapolation in the bijector                       |
| Bernstein Bijector Domain Min                | model_kwargs.bijector_kwargs.domain.0<br>Lower bound of the Bernstein polynomial bijector domain                           |
| Bernstein Bijector Domain Max                | model_kwargs.bijector_kwargs.domain.1<br>Upper bound of the Bernstein polynomial bijector domain                           |

Continued on next page

| Table Name                             | Parameter / Description                                                                                                         |
|----------------------------------------|---------------------------------------------------------------------------------------------------------------------------------|
| Invert Bijector                        | model_kwargs.invert<br>Indicates if the bijector should be inverted                                                             |
| Allow Flexible Bounds for Parameters   | model_kwargs.parameters_constraint_fn_kwargs.allow_flexible_bounds<br>Defines if flexible bounds are allowed for the parameters |
| Bounds constraints for Parameters      | model_kwargs.parameters_constraint_fn_kwargs.bounds<br>Defining the type of constraints on the bounds for the parameters        |
| Nested Bernstein Bijector Codomain Min | model_kwargs.parameters_constraint_fn_kwargs.low<br>Defines the lower bound for the corresponding parameters                    |
| Nested Bernstein Bijector Codomain Max | model_kwargs.parameters_constraint_fn_kwargs.high<br>Defines the upper bound for the corresponding parameters                   |
| Number of Parameters                   | model_kwargs.num_parameters<br>Total number of parameters in the model                                                          |
| Activation Function                    | model_kwargs.parameters_fn_kwargs.activation<br>Activation function of the used neural network                                  |
| First Hidden Units                     | model_kwargs.parameters_fn_kwargs.hidden_units.0<br>Number of units in the first hidden layer of the neural network             |
| Second Hidden Units                    | model_kwargs.parameters_fn_kwargs.hidden_units.1<br>Number of units in the second hidden layer of the neural network            |
| Third Hidden Units                     | model_kwargs.parameters_fn_kwargs.hidden_units.2<br>Number of units in the third hidden layer of the neural network             |
| Layer Overwrite 0 Domain Min           | model_kwargs.layer_overwrites.0.bijector_kwargs.domain.0<br>Lower boundary for the domain in layer overwrite 0                  |
| Layer Overwrite 0 Domain Max           | model_kwargs.layer_overwrites.0.bijector_kwargs.domain.1<br>Upper boundary for the domain in layer overwrite 0                  |
| Conditional                            | model_kwargs.parameters_fn_kwargs.conditional<br>Indicates if the parameter functions should get the covariates as input        |
| Conditional Event Shape                | model_kwargs.parameters_fn_kwargs.conditional_event_shape<br>Shape of the covariate vector                                      |
| JIT Compile                            | compile_kwargs.jit_compile<br>Defines whether to compile the model using Just-In-Time compilation for performance               |
| Epochs                                 | fit_kwargs.epochs<br>Maximum number of epochs                                                                                   |
| Batch Size                             | fit_kwargs.batch_size<br>Batch size used for training                                                                           |
| Learning Rate Decay Steps              | fit_kwargs.learning_rate.scheduler_kwargs.decay_steps<br>Steps after which to decay the learning rate with the scheduler        |
| Initial Learning Rate                  | fit_kwargs.learning_rate.scheduler_kwargs.initial_learning_rate                                                                 |

Continued on next page

| Table Name                                   | Parameter / Description                                                                                                    |
|----------------------------------------------|----------------------------------------------------------------------------------------------------------------------------|
|                                              | Initial learning rate for the learning rate scheduler                                                                      |
| Learning Rate Scheduler                      | fit_kwargs.learning_rate.scheduler_name<br>Name of the learning rate scheduler                                             |
| Early Stopping                               | fit_kwargs.early_stopping<br>Enable early stopping                                                                         |
| Validation Split                             | fit_kwargs.validation_split<br>Fraction of training data to be used as validation data                                     |
| Output Distribution                          | model_kwargs.distribution<br>Specifies the type of output distribution used in the model                                   |
| Number of Flows                              | model_kwargs.num_layers<br>Total number of layers in the model                                                             |
| Bijector                                     | model_kwargs.bijector<br>Specifies the bijector type to be used in the model                                               |
| Number of Parameters                         | model_kwargs.num_parameters<br>Total number of parameters in the model                                                     |
| Activation Function                          | model_kwargs.parameters_fn_kwargs.activation<br>Activation function of the used neural network                             |
| First Hidden Units                           | model_kwargs.parameters_fn_kwargs.hidden_units.0<br>Number of units in the first hidden layer of the neural network        |
| Second Hidden Units                          | model_kwargs.parameters_fn_kwargs.hidden_units.1<br>Number of units in the second hidden layer of the neural network       |
| Third Hidden Units                           | model_kwargs.parameters_fn_kwargs.hidden_units.2<br>Number of units in the third hidden layer of the neural network        |
| Spline Bijector Domain Min                   | model_kwargs.bijector_kwargs.range_min<br>Lower bound of the quadratic spline bijector domain                              |
| Interval Width for Nested Spline Bijector    | model_kwargs.parameters_constraint_fn_kwargs.interval_width<br>Specifies the interval width for constraint parameters      |
| Minimum Slope for Nested Spline Bijector     | model_kwargs.parameters_constraint_fn_kwargs.min_slope<br>Defines the minimum slope constraint for parameters              |
| Minimum Bin Width for Nested Spline Bijector | model_kwargs.parameters_constraint_fn_kwargs.min_bin_width<br>Defines the minimum bin width for the nested Spline bijector |
| Number of Bins for Nested Spline Bijector    | model_kwargs.parameters_constraint_fn_kwargs.nbins<br>Defines the number of bins used by the nested bijector               |
| Conditional                                  | model_kwargs.parameters_fn_kwargs.conditional<br>Indicates if the parameter functions should get the covariates as input   |
| Conditional Event Shape                      | model_kwargs.parameters_fn_kwargs.conditional_event_shape<br>Shape of the covariate vector                                 |

Continued on next page

| Table Name                | Parameter / Description                                                                                                       |
|---------------------------|-------------------------------------------------------------------------------------------------------------------------------|
| JIT Compile               | compile_kwargs.jit_compile<br>Defines whether to compile the model using Just-In-Time compilation for performance             |
| Epochs                    | fit_kwargs.epochs<br>Maximum number of epochs                                                                                 |
| Batch Size                | fit_kwargs.batch_size<br>Batch size used for training                                                                         |
| Learning Rate Decay Steps | fit_kwargs.learning_rate.scheduler_kwargs.decay_steps<br>Steps after which to decay the learning rate with the scheduler      |
| Initial Learning Rate     | fit_kwargs.learning_rate.scheduler_kwargs.initial_learning_rate<br>Initial learning rate for the learning rate scheduler      |
| Learning Rate Scheduler   | fit_kwargs.learning_rate.scheduler_name<br>Name of the learning rate scheduler                                                |
| Early Stopping            | fit_kwargs.early_stopping<br>Enable early stopping                                                                            |
| Validation Split          | fit_kwargs.validation_split<br>Fraction of training data to be used as validation data                                        |
| Output Distribution       | model_kwargs.distribution<br>Specifies the type of output distribution used in the model                                      |
| Activation Function       | model_kwargs.parameters_fn_kwargs.activation<br>Activation function of the used neural network                                |
| Batch Normalization       | model_kwargs.parameters_fn_kwargs.batch_norm<br>Specifies if batch normalization should be enabled in the used neural network |
| Dropout Rate              | model_kwargs.parameters_fn_kwargs.dropout<br>Dropout rate for the neural network                                              |
| First Hidden Units        | model_kwargs.parameters_fn_kwargs.hidden_units.0<br>Number of units in the first hidden layer of the neural network           |
| Second Hidden Units       | model_kwargs.parameters_fn_kwargs.hidden_units.1<br>Number of units in the second hidden layer of the neural network          |
| Conditional               | model_kwargs.parameters_fn_kwargs.conditional<br>Indicates if the parameter functions should get the covariates as input      |
| Conditional Event Shape   | model_kwargs.parameters_fn_kwargs.conditional_event_shape<br>Shape of the covariate vector                                    |
| Epochs                    | fit_kwargs.epochs<br>Maximum number of epochs                                                                                 |
| Batch Size                | fit_kwargs.batch_size<br>Batch size used for training                                                                         |
| Learning Rate Decay Steps | fit_kwargs.learning_rate.scheduler_kwargs.decay_steps                                                                         |

Continued on next page

| Table Name                                            | Parameter / Description                                                                                                                                           |
|-------------------------------------------------------|-------------------------------------------------------------------------------------------------------------------------------------------------------------------|
|                                                       | Steps after which to decay the learning rate with the scheduler                                                                                                   |
| Initial Learning Rate                                 | fit_kwargs.learning_rate.scheduler_kwargs.initial_learning_rate<br>Initial learning rate for the learning rate scheduler                                          |
| Learning Rate Scheduler                               | fit_kwargs.learning_rate.scheduler_name<br>Name of the learning rate scheduler                                                                                    |
| Validation Split                                      | fit_kwargs.validation_split<br>Fraction of training data to be used as validation data                                                                            |
| Two-Stage Training                                    | two_stage_training<br>Indicates if the model should be trained in two stages                                                                                      |
| First Marginal Bijector                               | model_kwargs.marginal_bijectors.0.bijector<br>Specifies the type of the first marginal bijector                                                                   |
| Invert First Marginal Bijector                        | model_kwargs.marginal_bijectors.0.invert<br>Indicates if the first marginal bijector should allow inversion                                                       |
| Marginal Bijector Domain Min                          | model_kwargs.marginal_bijectors.0.bijector_kwargs.domain.0<br>Lower boundary for the domain of the first marginal bijector                                        |
| Marginal Bijector Domain Max                          | model_kwargs.marginal_bijectors.0.bijector_kwargs.domain.1<br>Upper boundary for the domain of the first marginal bijector                                        |
| Marginal Bijector Extrapolation                       | model_kwargs.marginal_bijectors.0.bijector_kwargs.extrapolation<br>Defines whether to allow extrapolation in the first marginal bijector                          |
| First Marginal Bijector Parameter Constraint Function | model_kwargs.marginal_bijectors.0.parameters_constraint_fn<br>Constraint function for the parameters of the first marginal bijector                               |
| Allow Flexible Bounds for First Marginal Bijector     | model_kwargs.marginal_bijectors.0.parameters_constraint_fn_kwargs.allow_flexible_bounds<br>Defines if flexible bounds are allowed for the first marginal bijector |
| Bounds constraints for First Marginal Bijector        | model_kwargs.marginal_bijectors.0.parameters_constraint_fn_kwargs.bounds<br>Defining the constraints on the bounds for the first marginal bijector                |
| First Marginal Bijector Codomain Max                  | model_kwargs.marginal_bijectors.0.parameters_constraint_fn_kwargs.high<br>Defines the upper bound for parameters in the first marginal bijector                   |
| First Marginal Bijector Codomain Min                  | model_kwargs.marginal_bijectors.0.parameters_constraint_fn_kwargs.low<br>Defines the lower bound for parameters in the first marginal bijector                    |
| Parameters Function for First Marginal Bijector       | model_kwargs.marginal_bijectors.0.parameters_fn<br>Function for calculating parameters of the first marginal bijector                                             |
| First Marginal Bijector Parameter Shape 0             | model_kwargs.marginal_bijectors.0.parameters_fn_kwargs.parameter_shape.0<br>Defines the parameter shape dimension 0 for the first marginal bijector               |
| First Marginal Bijector Parameter Shape 1             | model_kwargs.marginal_bijectors.0.parameters_fn_kwargs.parameter_shape.1<br>Defines the parameter shape dimension 1 for the first marginal bijector               |
| First Joint Bijector                                  | model_kwargs.joint_bijectors.0.bijector<br>Specifies the first bijector type for the joint distribution                                                           |

Continued on next page

| Table Name                                       | Parameter / Description                                                                                                                                         |
|--------------------------------------------------|-----------------------------------------------------------------------------------------------------------------------------------------------------------------|
| Invert First Joint Bijector                      | model_kwargs.joint_bijectors.0.invert<br>Indicates if the first joint bijector should allow inversion                                                           |
| Parameter Shape 0 for Joint Bijector             | model_kwargs.joint_bijectors.0.parameters_fn_kwargs.parameter_shape.0<br>Defines the parameter shape dimension 0 for the joint bijector                         |
| Early Stopping                                   | fit_kwargs.early_stopping<br>Enable early stopping                                                                                                              |
| Second Marginal Bijector                         | model_kwargs.marginal_bijectors.1.bijector<br>Specifies the type of second marginal bijector                                                                    |
| Invert Second Marginal Bijector                  | model_kwargs.marginal_bijectors.1.invert<br>Indicates if the second marginal bijector should allow inversion                                                    |
| Parameters Function for Second Marginal Bijector | model_kwargs.marginal_bijectors.1.parameters_fn<br>Function for calculating parameters of the second marginal bijector                                          |
| Second Marginal Bijector Conditional Event Shape | model_kwargs.marginal_bijectors.1.parameters_fn_kwargs.conditional_event_shape<br>Shape of the conditional events for the second marginal bijector              |
| Extrapolation for Second Marginal Bijector       | model_kwargs.marginal_bijectors.1.parameters_fn_kwargs.extrapolation<br>Defines whether to allow extrapolation in the second marginal bijector                  |
| Second Marginal Bijector Parameter Shape 0       | model_kwargs.marginal_bijectors.1.parameters_fn_kwargs.parameter_shape.0<br>Defines the parameter shape dimension 0 for the second marginal bijector            |
| Polynomial Order for Second Marginal Bijector    | model_kwargs.marginal_bijectors.1.parameters_fn_kwargs.polynomial_order<br>Defines the order of the polynomial for computations in the second marginal bijector |
| Joint Bijector Conditional Event Shape           | model_kwargs.joint_bijectors.0.parameters_fn_kwargs.conditional_event_shape<br>Shape of the conditional events for the joint bijector                           |
| Extrapolation for Joint Bijector                 | model_kwargs.joint_bijectors.0.parameters_fn_kwargs.extrapolation<br>Defines whether to allow extrapolation in the joint bijector                               |
| Polynomial Order for Joint Bijector              | model_kwargs.joint_bijectors.0.parameters_fn_kwargs.polynomial_order<br>Defines the order of the polynomial for computations in the joint bijector              |
| Parameter Shape 1 for Joint Bijector             | model_kwargs.joint_bijectors.0.parameters_fn_kwargs.parameter_shape.1<br>Defines the parameter shape dimension 1 for the joint bijector                         |
| Two-Stage Training                               | two_stage_training<br>Indicates if the model should be trained in two stages                                                                                    |
| First Marginal Bijector                          | model_kwargs.marginal_bijectors.0.bijector<br>Specifies the type of the first marginal bijector                                                                 |
| Invert First Marginal Bijector                   | model_kwargs.marginal_bijectors.0.invert<br>Indicates if the first marginal bijector should allow inversion                                                     |
| Marginal Bijector Domain Min                     | model_kwargs.marginal_bijectors.0.bijector_kwargs.domain.0<br>Lower boundary for the domain of the first marginal bijector                                      |
| Marginal Bijector Domain Max                     | model_kwargs.marginal_bijectors.0.bijector_kwargs.domain.1                                                                                                      |

Continued on next page

| Table Name                                            | Parameter / Description                                                                                                                                           |
|-------------------------------------------------------|-------------------------------------------------------------------------------------------------------------------------------------------------------------------|
|                                                       | Upper boundary for the domain of the first marginal bijector                                                                                                      |
| Marginal Bijector Extrapolation                       | model_kwargs.marginal_bijectors.0.bijector_kwargs.extrapolation<br>Defines whether to allow extrapolation in the first marginal bijector                          |
| First Marginal Bijector Parameter Constraint Function | model_kwargs.marginal_bijectors.0.parameters_constraint_fn<br>Constraint function for the parameters of the first marginal bijector                               |
| Allow Flexible Bounds for First Marginal Bijector     | model_kwargs.marginal_bijectors.0.parameters_constraint_fn_kwargs.allow_flexible_bounds<br>Defines if flexible bounds are allowed for the first marginal bijector |
| Bounds constraints for First Marginal Bijector        | model_kwargs.marginal_bijectors.0.parameters_constraint_fn_kwargs.bounds<br>Defining the constraints on the bounds for the first marginal bijector                |
| First Marginal Bijector Codomain Max                  | model_kwargs.marginal_bijectors.0.parameters_constraint_fn_kwargs.high<br>Defines the upper bound for parameters in the first marginal bijector                   |
| First Marginal Bijector Codomain Min                  | model_kwargs.marginal_bijectors.0.parameters_constraint_fn_kwargs.low<br>Defines the lower bound for parameters in the first marginal bijector                    |
| First Marginal Bijector Parameter Shape 0             | model_kwargs.marginal_bijectors.0.parameters_fn_kwargs.parameter_shape.0<br>Defines the parameter shape dimension 0 for the first marginal bijector               |
| First Marginal Bijector Parameter Shape 1             | model_kwargs.marginal_bijectors.0.parameters_fn_kwargs.parameter_shape.1<br>Defines the parameter shape dimension 1 for the first marginal bijector               |
| First Joint Bijector                                  | model_kwargs.joint_bijectors.0.bijector<br>Specifies the first bijector type for the joint distribution                                                           |
| Parameter Shape 0 for Joint Bijector                  | model_kwargs.joint_bijectors.0.parameters_fn_kwargs.parameter_shape.0<br>Defines the parameter shape dimension 0 for the joint bijector                           |
| Marginal Epochs                                       | fit_kwargs.0.epochs<br>Number of epochs for training the marginal distribution model                                                                              |
| Marginal Batch Size                                   | fit_kwargs.0.batch_size<br>Batch size for training the marginal distribution model                                                                                |
| Marginal Learning Rate                                | fit_kwargs.0.learning_rate<br>Learning rate used to optimize the marginal distribution                                                                            |
| Marginal Reduce LR on Plateau                         | fit_kwargs.0.reduce_lr_on_plateau<br>Whether to reduce learning rate on a plateau during training                                                                 |
| Marginal Early Stopping                               | fit_kwargs.0.early_stopping<br>Enables early stopping for the marginal model training                                                                             |
| Marginal Monitor                                      | fit_kwargs.0.monitor<br>Metric to monitor during training for early stopping                                                                                      |
| Marginal Verbosity                                    | fit_kwargs.0.verbose<br>Verbosity mode for the marginal model training                                                                                            |
| Marginal Validation Split                             | fit_kwargs.0.validation_split<br>Fraction of training data to be used as validation data for the marginal model                                                   |

Continued on next page



| Table Name                                      | Parameter / Description                                                                                                                                                  |
|-------------------------------------------------|--------------------------------------------------------------------------------------------------------------------------------------------------------------------------|
| Joint Epochs                                    | fit_kwargs.1.epochs<br>Maximum number of epochs for training the joint distribution model                                                                                |
| Joint Batch Size                                | fit_kwargs.1.batch_size<br>Batch size for training the joint distribution model                                                                                          |
| Joint Learning Rate Decay Steps                 | fit_kwargs.1.learning_rate.scheduler_kwargs.decay_steps<br>Total number of decay steps for the learning rate scheduler of the joint model                                |
| Joint Initial Learning Rate                     | fit_kwargs.1.learning_rate.scheduler_kwargs.initial_learning_rate<br>Initial learning rate for the learning rate scheduler for the joint model                           |
| Joint Learning Rate Scheduler                   | fit_kwargs.1.learning_rate.scheduler_name<br>Name of the learning rate scheduler for the joint model                                                                     |
| Joint Early Stopping                            | fit_kwargs.1.early_stopping<br>Enables early stopping for the joint model training                                                                                       |
| Joint Validation Split                          | fit_kwargs.1.validation_split<br>Fraction of training data to be used as validation data for the joint model                                                             |
| Masked Dimensions                               | model_kwargs.joint_bijectors.0.bijector_kwargs.num_masked<br>Number of dimensions mask in the Coupling Flow                                                              |
| First Nested Bijector                           | model_kwargs.joint_bijectors.0.nested_bijector.bijector<br>Specifies the type of nested bijector used in the first joint bijector                                        |
| Invert Nested Bijector                          | model_kwargs.joint_bijectors.0.nested_bijector.invert<br>Specifies if the nested bijector should be invertible                                                           |
| Nested Bernstein Bijector Domain Min            | model_kwargs.joint_bijectors.0.nested_bijector.bijector_kwargs.domain.0<br>Lower boundary for the nested Bernstein bijector domain                                       |
| Nested Bernstein Bijector Domain Max            | model_kwargs.joint_bijectors.0.nested_bijector.bijector_kwargs.domain.1<br>Upper boundary for the nested Bernstein bijector domain                                       |
| Nested Bernstein Bijector Extrapolation         | model_kwargs.joint_bijectors.0.nested_bijector.bijector_kwargs.extrapolation<br>Defines whether to allow extrapolation in the nested Bernstein bijector                  |
| Nested Bijector Parameter Constraint Function   | model_kwargs.joint_bijectors.0.nested_bijector.parameters_constraint_fn<br>Constraint function applied to the parameters of the nested bijector                          |
| Bounds constraints of Nested Bernstein Bijector | model_kwargs.joint_bijectors.0.nested_bijector.parameters_constraint_fn_kwargs.bounds<br>Defining the type of constraints on the bounds of the nested Bernstein bijector |
| Nested Bernstein Bijector Codomain Max          | model_kwargs.joint_bijectors.0.nested_bijector.parameters_constraint_fn_kwargs.high<br>Defines the upper bound for the corresponding parameters                          |
| Nested Bernstein Bijector Codomain Min          | model_kwargs.joint_bijectors.0.nested_bijector.parameters_constraint_fn_kwargs.low<br>Defines the lower bound for the corresponding parameters                           |
| Activation Function for Joint Bijector          | model_kwargs.joint_bijectors.0.parameters_fn_kwargs.activation<br>Activation function used in the neural network used to estimate the joint bijector parameters          |
| Batch Normalization for Joint Bijector          | model_kwargs.joint_bijectors.0.parameters_fn_kwargs.batch_norm                                                                                                           |

Continued on next page

| Table Name                                      | Parameter / Description                                                                                                                                        |
|-------------------------------------------------|----------------------------------------------------------------------------------------------------------------------------------------------------------------|
|                                                 | Specifies if batch normalization should be applied in the joint bijector                                                                                       |
| Dropout Rate for Joint Bijector                 | model_kwargs.joint_bijectors.0.parameters_fn_kwargs.dropout<br>Dropout rate to apply in the joint bijector neural network                                      |
| First Hidden Units for Joint Bijector           | model_kwargs.joint_bijectors.0.parameters_fn_kwargs.hidden_units.0<br>Number of units in the first hidden layer of the joint bijector                          |
| Input Shape 0 for Joint Bijector                | model_kwargs.joint_bijectors.0.parameters_fn_kwargs.input_shape.0<br>Defines the input shape dimension 0 for the joint bijector                                |
| JIT Compile                                     | compile_kwargs.jit_compile<br>Defines whether to compile the model using Just-In-Time compilation for performance                                              |
| Parameters Function for First Marginal Bijector | model_kwargs.marginal_bijectors.0.parameters_fn<br>Function for calculating parameters of the first marginal bijector                                          |
| Joint Bijector Conditional Event Shape          | model_kwargs.joint_bijectors.0.parameters_fn_kwargs.conditional_event_shape<br>Shape of the conditional events for the joint bijector                          |
| Extrapolation for First Marginal Bijector       | model_kwargs.marginal_bijectors.0.parameters_fn_kwargs.extrapolation<br>Defines whether to allow extrapolation in the first marginal bijector                  |
| First Marginal Bijector Conditional Event Shape | model_kwargs.marginal_bijectors.0.parameters_fn_kwargs.conditional_event_shape<br>Shape of conditional events for the first marginal bijector                  |
| Polynomial Order for First Marginal Bijector    | model_kwargs.marginal_bijectors.0.parameters_fn_kwargs.polynomial_order<br>Defines the order of the polynomial for computations in the first marginal bijector |
| Second Hidden Units for Joint Bijector          | model_kwargs.joint_bijectors.0.parameters_fn_kwargs.hidden_units.1<br>Number of units in the second hidden layer of the joint bijector                         |
| Third Hidden Units for Joint Bijector           | model_kwargs.joint_bijectors.0.parameters_fn_kwargs.hidden_units.2<br>Number of units in the third hidden layer of the joint bijector                          |
| Parameter Shape 1 for Joint Bijector            | model_kwargs.joint_bijectors.0.parameters_fn_kwargs.parameter_shape.1<br>Defines the parameter shape dimension 1 for the joint bijector                        |
| Is Conditional for Joint Bijector               | model_kwargs.joint_bijectors.0.parameters_fn_kwargs.conditional<br>Indicates if the joint bijector is conditional                                              |
| Two-Stage Training                              | two_stage_training<br>Indicates if the model should be trained in two stages                                                                                   |
| First Marginal Bijector                         | model_kwargs.marginal_bijectors.0.bijector<br>Specifies the type of the first marginal bijector                                                                |
| Invert First Marginal Bijector                  | model_kwargs.marginal_bijectors.0.invert<br>Indicates if the first marginal bijector should allow inversion                                                    |
| Marginal Bijector Domain Min                    | model_kwargs.marginal_bijectors.0.bijector_kwargs.domain.0<br>Lower boundary for the domain of the first marginal bijector                                     |
| Marginal Bijector Domain Max                    | model_kwargs.marginal_bijectors.0.bijector_kwargs.domain.1<br>Upper boundary for the domain of the first marginal bijector                                     |

Continued on next page

| Table Name                                            | Parameter / Description                                                                                                                                           |
|-------------------------------------------------------|-------------------------------------------------------------------------------------------------------------------------------------------------------------------|
| Marginal Bijector Extrapolation                       | model_kwargs.marginal_bijectors.0.bijector_kwargs.extrapolation<br>Defines whether to allow extrapolation in the first marginal bijector                          |
| First Marginal Bijector Parameter Constraint Function | model_kwargs.marginal_bijectors.0.parameters_constraint_fn<br>Constraint function for the parameters of the first marginal bijector                               |
| Allow Flexible Bounds for First Marginal Bijector     | model_kwargs.marginal_bijectors.0.parameters_constraint_fn_kwargs.allow_flexible_bounds<br>Defines if flexible bounds are allowed for the first marginal bijector |
| Bounds constraints for First Marginal Bijector        | model_kwargs.marginal_bijectors.0.parameters_constraint_fn_kwargs.bounds<br>Defining the constraints on the bounds for the first marginal bijector                |
| First Marginal Bijector Codomain Max                  | model_kwargs.marginal_bijectors.0.parameters_constraint_fn_kwargs.high<br>Defines the upper bound for parameters in the first marginal bijector                   |
| First Marginal Bijector Codomain Min                  | model_kwargs.marginal_bijectors.0.parameters_constraint_fn_kwargs.low<br>Defines the lower bound for parameters in the first marginal bijector                    |
| First Marginal Bijector Parameter Shape 0             | model_kwargs.marginal_bijectors.0.parameters_fn_kwargs.parameter_shape.0<br>Defines the parameter shape dimension 0 for the first marginal bijector               |
| First Marginal Bijector Parameter Shape 1             | model_kwargs.marginal_bijectors.0.parameters_fn_kwargs.parameter_shape.1<br>Defines the parameter shape dimension 1 for the first marginal bijector               |
| First Joint Bijector                                  | model_kwargs.joint_bijectors.0.bijector<br>Specifies the first bijector type for the joint distribution                                                           |
| Parameter Shape 0 for Joint Bijector                  | model_kwargs.joint_bijectors.0.parameters_fn_kwargs.parameter_shape.0<br>Defines the parameter shape dimension 0 for the joint bijector                           |
| Marginal Epochs                                       | fit_kwargs.0.epochs<br>Number of epochs for training the marginal distribution model                                                                              |
| Marginal Batch Size                                   | fit_kwargs.0.batch_size<br>Batch size for training the marginal distribution model                                                                                |
| Marginal Learning Rate                                | fit_kwargs.0.learning_rate<br>Learning rate used to optimize the marginal distribution                                                                            |
| Marginal Reduce LR on Plateau                         | fit_kwargs.0.reduce_lr_on_plateau<br>Whether to reduce learning rate on a plateau during training                                                                 |
| Marginal Early Stopping                               | fit_kwargs.0.early_stopping<br>Enables early stopping for the marginal model training                                                                             |
| Marginal Monitor                                      | fit_kwargs.0.monitor<br>Metric to monitor during training for early stopping                                                                                      |
| Marginal Verbosity                                    | fit_kwargs.0.verbose<br>Verbosity mode for the marginal model training                                                                                            |
| Marginal Validation Split                             | fit_kwargs.0.validation_split<br>Fraction of training data to be used as validation data for the marginal model                                                   |
| Joint Epochs                                          | fit_kwargs.1.epochs                                                                                                                                               |

Continued on next page

| Table Name                                | Parameter / Description                                                                                                                                         |
|-------------------------------------------|-----------------------------------------------------------------------------------------------------------------------------------------------------------------|
|                                           | Maximum number of epochs for training the joint distribution model                                                                                              |
| Joint Batch Size                          | fit_kwargs.1.batch_size<br>Batch size for training the joint distribution model                                                                                 |
| Joint Learning Rate Decay Steps           | fit_kwargs.1.learning_rate.scheduler_kwargs.decay_steps<br>Total number of decay steps for the learning rate scheduler of the joint model                       |
| Joint Initial Learning Rate               | fit_kwargs.1.learning_rate.scheduler_kwargs.initial_learning_rate<br>Initial learning rate for the learning rate scheduler for the joint model                  |
| Joint Learning Rate Scheduler             | fit_kwargs.1.learning_rate.scheduler_name<br>Name of the learning rate scheduler for the joint model                                                            |
| Joint Early Stopping                      | fit_kwargs.1.early_stopping<br>Enables early stopping for the joint model training                                                                              |
| Joint Validation Split                    | fit_kwargs.1.validation_split<br>Fraction of training data to be used as validation data for the joint model                                                    |
| Masked Dimensions                         | model_kwargs.joint_bijectors.0.bijector_kwargs.num_masked<br>Number of deimensions mask in the Coupling Flow                                                    |
| First Nested Bijector                     | model_kwargs.joint_bijectors.0.nested_bijector.bijector<br>Specifies the type of nested bijector used in the first joint bijector                               |
| Activation Function for Joint Bijector    | model_kwargs.joint_bijectors.0.parameters_fn_kwargs.activation<br>Activation function used in the neural network used to estimate the joint bijector parameters |
| Batch Normalization for Joint Bijector    | model_kwargs.joint_bijectors.0.parameters_fn_kwargs.batch_norm<br>Specifies if batch normalization should be applied in the joint bijector                      |
| Dropout Rate for Joint Bijector           | model_kwargs.joint_bijectors.0.parameters_fn_kwargs.dropout<br>Dropout rate to apply in the joint bijector neural network                                       |
| First Hidden Units for Joint Bijector     | model_kwargs.joint_bijectors.0.parameters_fn_kwargs.hidden_units.0<br>Number of units in the first hidden layer of the joint bijector                           |
| Second Hidden Units for Joint Bijector    | model_kwargs.joint_bijectors.0.parameters_fn_kwargs.hidden_units.1<br>Number of units in the second hidden layer of the joint bijector                          |
| Third Hidden Units for Joint Bijector     | model_kwargs.joint_bijectors.0.parameters_fn_kwargs.hidden_units.2<br>Number of units in the third hidden layer of the joint bijector                           |
| Input Shape 0 for Joint Bijector          | model_kwargs.joint_bijectors.0.parameters_fn_kwargs.input_shape.0<br>Defines the input shape dimension 0 for the joint bijector                                 |
| Parameter Shape 1 for Joint Bijector      | model_kwargs.joint_bijectors.0.parameters_fn_kwargs.parameter_shape.1<br>Defines the parameter shape dimension 1 for the joint bijector                         |
| Nested Spline Bijector Range Min          | model_kwargs.joint_bijectors.0.nested_bijector.bijector_kwargs.range_min<br>Minimum range value for the nested bijector transformation                          |
| Interval Width for Nested Spline Bijector | model_kwargs.joint_bijectors.0.nested_bijector.parameters_constraint_fn_kwargs.interval_width<br>Specifies the interval width for constraint parameters         |

Continued on next page

| Table Name                                      | Parameter / Description                                                                                                                                        |
|-------------------------------------------------|----------------------------------------------------------------------------------------------------------------------------------------------------------------|
| Minimum Slope for Nested Spline Bijector        | model_kwargs.joint_bijectors.0.nested_bijector.parameters_constraint_fn_kwargs.min_slope<br>Defines the minimum slope constraint for parameters                |
| Minimum Bin Width for Nested Spline Bijector    | model_kwargs.joint_bijectors.0.nested_bijector.parameters_constraint_fn_kwargs.min_bin_width<br>Defines the minimum bin width for the nested Spline bijector   |
| Number of Bins for Nested Spline Bijector       | model_kwargs.joint_bijectors.0.nested_bijector.parameters_constraint_fn_kwargs.nbins<br>Defines the number of bins used by the nested bijector                 |
| JIT Compile                                     | compile_kwargs.jit_compile<br>Defines whether to compile the model using Just-In-Time compilation for performance                                              |
| Parameters Function for First Marginal Bijector | model_kwargs.marginal_bijectors.0.parameters_fn<br>Function for calculating parameters of the first marginal bijector                                          |
| Joint Bijector Conditional Event Shape          | model_kwargs.joint_bijectors.0.parameters_fn_kwargs.conditional_event_shape<br>Shape of the conditional events for the joint bijector                          |
| Extrapolation for First Marginal Bijector       | model_kwargs.marginal_bijectors.0.parameters_fn_kwargs.extrapolation<br>Defines whether to allow extrapolation in the first marginal bijector                  |
| First Marginal Bijector Conditional Event Shape | model_kwargs.marginal_bijectors.0.parameters_fn_kwargs.conditional_event_shape<br>Shape of conditional events for the first marginal bijector                  |
| Polynomial Order for First Marginal Bijector    | model_kwargs.marginal_bijectors.0.parameters_fn_kwargs.polynomial_order<br>Defines the order of the polynomial for computations in the first marginal bijector |
| Is Conditional for Joint Bijector               | model_kwargs.joint_bijectors.0.parameters_fn_kwargs.conditional<br>Indicates if the joint bijector is conditional                                              |
| Epochs                                          | fit_kwargs.epochs<br>Maximum number of epochs                                                                                                                  |
| Learning Rate Decay Steps                       | fit_kwargs.learning_rate.scheduler_kwargs.decay_steps<br>Steps after which to decay the learning rate with the scheduler                                       |
| Learning Rate Scheduler                         | fit_kwargs.learning_rate.scheduler_name<br>Name of the learning rate scheduler                                                                                 |
| Early Stopping                                  | fit_kwargs.early_stopping<br>Enable early stopping                                                                                                             |
| Output Distribution                             | model_kwargs.distribution<br>Specifies the type of output distribution used in the model                                                                       |
| Number of Flows                                 | model_kwargs.num_layers<br>Total number of layers in the model                                                                                                 |
| Bijector                                        | model_kwargs.bijector<br>Specifies the bijector type to be used in the model                                                                                   |
| Activation Function                             | model_kwargs.parameters_fn_kwargs.activation<br>Activation function of the used neural network                                                                 |
| Spline Bijector Domain Min                      | model_kwargs.bijector_kwargs.range_min                                                                                                                         |

Continued on next page

| Table Name                                            | Parameter / Description                                                                                                                                           |
|-------------------------------------------------------|-------------------------------------------------------------------------------------------------------------------------------------------------------------------|
|                                                       | Lower bound of the quadratic spline bijector domain                                                                                                               |
| Interval Width for Nested Spline Bijector             | model_kwargs.parameters_constraint_fn_kwargs.interval_width<br>Specifies the interval width for constraint parameters                                             |
| Minimum Slope for Nested Spline Bijector              | model_kwargs.parameters_constraint_fn_kwargs.min_slope<br>Defines the minimum slope constraint for parameters                                                     |
| Minimum Bin Width for Nested Spline Bijector          | model_kwargs.parameters_constraint_fn_kwargs.min_bin_width<br>Defines the minimum bin width for the nested Spline bijector                                        |
| Use Invertible Linear Transformations                 | model_kwargs.use_invertible_linear_transformations<br>Specifies if invertible linear transformations should be employed                                           |
| Batch Size                                            | fit_kwargs.batch_size<br>Batch size used for training                                                                                                             |
| Initial Learning Rate                                 | fit_kwargs.learning_rate.scheduler_kwargs.initial_learning_rate<br>Initial learning rate for the learning rate scheduler                                          |
| Number of Parameters                                  | model_kwargs.num_parameters<br>Total number of parameters in the model                                                                                            |
| First Hidden Units                                    | model_kwargs.parameters_fn_kwargs.hidden_units.0<br>Number of units in the first hidden layer of the neural network                                               |
| Second Hidden Units                                   | model_kwargs.parameters_fn_kwargs.hidden_units.1<br>Number of units in the second hidden layer of the neural network                                              |
| Number of Bins for Nested Spline Bijector             | model_kwargs.parameters_constraint_fn_kwargs.nbins<br>Defines the number of bins used by the nested bijector                                                      |
| Two-Stage Training                                    | two_stage_training<br>Indicates if the model should be trained in two stages                                                                                      |
| First Marginal Bijector                               | model_kwargs.marginal_bijectors.0.bijector<br>Specifies the type of the first marginal bijector                                                                   |
| Invert First Marginal Bijector                        | model_kwargs.marginal_bijectors.0.invert<br>Indicates if the first marginal bijector should allow inversion                                                       |
| Marginal Bijector Extrapolation                       | model_kwargs.marginal_bijectors.0.bijector_kwargs.extrapolation<br>Defines whether to allow extrapolation in the first marginal bijector                          |
| First Marginal Bijector Parameter Constraint Function | model_kwargs.marginal_bijectors.0.parameters_constraint_fn<br>Constraint function for the parameters of the first marginal bijector                               |
| Allow Flexible Bounds for First Marginal Bijector     | model_kwargs.marginal_bijectors.0.parameters_constraint_fn_kwargs.allow_flexible_bounds<br>Defines if flexible bounds are allowed for the first marginal bijector |
| Bounds constraints for First Marginal Bijector        | model_kwargs.marginal_bijectors.0.parameters_constraint_fn_kwargs.bounds<br>Defining the constraints on the bounds for the first marginal bijector                |
| First Marginal Bijector Codomain Max                  | model_kwargs.marginal_bijectors.0.parameters_constraint_fn_kwargs.high<br>Defines the upper bound for parameters in the first marginal bijector                   |

Continued on next page

| Table Name                                      | Parameter / Description                                                                                                                             |
|-------------------------------------------------|-----------------------------------------------------------------------------------------------------------------------------------------------------|
| First Marginal Bijector Codomain Min            | model_kwargs.marginal_bijectors.0.parameters_constraint_fn_kwargs.low<br>Defines the lower bound for parameters in the first marginal bijector      |
| Parameters Function for First Marginal Bijector | model_kwargs.marginal_bijectors.0.parameters_fn<br>Function for calculating parameters of the first marginal bijector                               |
| First Marginal Bijector Parameter Shape 1       | model_kwargs.marginal_bijectors.0.parameters_fn_kwargs.parameter_shape.1<br>Defines the parameter shape dimension 1 for the first marginal bijector |
| Marginal Reduce LR on Plateau                   | fit_kwargs.0.reduce_lr_on_plateau<br>Whether to reduce learning rate on a plateau during training                                                   |
| Marginal Early Stopping                         | fit_kwargs.0.early_stopping<br>Enables early stopping for the marginal model training                                                               |
| Marginal Monitor                                | fit_kwargs.0.monitor<br>Metric to monitor during training for early stopping                                                                        |
| Marginal Verbosity                              | fit_kwargs.0.verbose<br>Verbosity mode for the marginal model training                                                                              |
| Joint Epochs                                    | fit_kwargs.1.epochs<br>Maximum number of epochs for training the joint distribution model                                                           |
| Joint Learning Rate Decay Steps                 | fit_kwargs.1.learning_rate.scheduler_kwargs.decay_steps<br>Total number of decay steps for the learning rate scheduler of the joint model           |
| Joint Learning Rate Scheduler                   | fit_kwargs.1.learning_rate.scheduler_name<br>Name of the learning rate scheduler for the joint model                                                |
| Joint Early Stopping                            | fit_kwargs.1.early_stopping<br>Enables early stopping for the joint model training                                                                  |
| Type of Joint Flow                              | model_kwargs.joint_flow_type<br>Specifies the type of flow used in the model                                                                        |
| Number of Flows                                 | model_kwargs.joint_bijectors.num_layers<br>Total number of layers in the joint bijectors                                                            |
| Use Invertible Linear Transformations           | model_kwargs.joint_bijectors.use_invertible_linear_transformations<br>Specifies if invertible linear transformations should be used                 |
| Random Permutation Seed                         | model_kwargs.joint_bijectors.random_permutation_seed<br>Seed value for random permutation in bijectors                                              |
| Joint Bijector                                  | model_kwargs.joint_bijectors.bijector<br>Specifies the bijector type to be used in the joint model                                                  |
| Joint Bijector Range Min                        | model_kwargs.joint_bijectors.bijector_kwargs.range_min<br>Minimum range value for the joint bijector transformation                                 |
| Interval Width for Joint Bijector               | model_kwargs.joint_bijectors.parameters_constraint_fn_kwargs.interval_width<br>Specifies the interval width for constraint parameters               |
| Minimum Slope for Joint Bijector                | model_kwargs.joint_bijectors.parameters_constraint_fn_kwargs.min_slope                                                                              |

Continued on next page

| Table Name                                | Parameter / Description                                                                                                                             |
|-------------------------------------------|-----------------------------------------------------------------------------------------------------------------------------------------------------|
|                                           | Defines the minimum slope constraint for parameters                                                                                                 |
| Minimum Bin Width for Joint Bijector      | model_kwargs.joint_bijectors.parameters_constraint_fn_kwargs.min_bin_width<br>Defines the minimum bin width for the joint bijector                  |
| Number of Bins for Joint Bijector         | model_kwargs.joint_bijectors.parameters_constraint_fn_kwargs.nbins<br>Defines the number of bins used by the joint bijector                         |
| Number of Parameters for Joint Bijectors  | model_kwargs.joint_bijectors.num_parameters<br>Total number of parameters in the joint bijectors                                                    |
| Activation Function for MAF               | model_kwargs.joint_bijectors.maf_parameters_fn_kwargs.activation<br>Activation function used in the neural network for MAF parameters               |
| Activation Function for X0 Parameters     | model_kwargs.joint_bijectors.x0_parameters_fn_kwargs.activation<br>Activation function for x0 parameters in the joint bijector                      |
| Batch Normalization for X0 Parameters     | model_kwargs.joint_bijectors.x0_parameters_fn_kwargs.batch_norm<br>Specifies if batch normalization should be applied to x0 parameters              |
| Dropout Rate for X0 Parameters            | model_kwargs.joint_bijectors.x0_parameters_fn_kwargs.dropout<br>Dropout rate for the x0 parameters neural network                                   |
| First Marginal Bijector Parameter Shape 0 | model_kwargs.marginal_bijectors.0.parameters_fn_kwargs.parameter_shape.0<br>Defines the parameter shape dimension 0 for the first marginal bijector |
| Marginal Epochs                           | fit_kwargs.0.epochs<br>Number of epochs for training the marginal distribution model                                                                |
| Marginal Batch Size                       | fit_kwargs.0.batch_size<br>Batch size for training the marginal distribution model                                                                  |
| Marginal Learning Rate                    | fit_kwargs.0.learning_rate<br>Learning rate used to optimize the marginal distribution                                                              |
| Joint Batch Size                          | fit_kwargs.1.batch_size<br>Batch size for training the joint distribution model                                                                     |
| Joint Initial Learning Rate               | fit_kwargs.1.learning_rate.scheduler_kwargs.initial_learning_rate<br>Initial learning rate for the learning rate scheduler for the joint model      |
| First Hidden Units for MAF                | model_kwargs.joint_bijectors.maf_parameters_fn_kwargs.hidden_units.0<br>Number of units in the first hidden layer of the MAF                        |
| Second Hidden Units for MAF               | model_kwargs.joint_bijectors.maf_parameters_fn_kwargs.hidden_units.1<br>Number of units in the second hidden layer of the MAF                       |
| First Hidden Units for X0 Network         | model_kwargs.joint_bijectors.x0_parameters_fn_kwargs.hidden_units.0<br>Number of units in the first hidden layer for x0 parameters                  |
| Second Hidden Units for X0 Network        | model_kwargs.joint_bijectors.x0_parameters_fn_kwargs.hidden_units.1<br>Number of units in the second hidden layer for x0 parameters                 |
| Two-Stage Training                        | two_stage_training<br>Indicates if the model should be trained in two stages                                                                        |

Continued on next page



| Table Name                                            | Parameter / Description                                                                                                                                           |
|-------------------------------------------------------|-------------------------------------------------------------------------------------------------------------------------------------------------------------------|
| First Marginal Bijector                               | model_kwargs.marginal_bijectors.0.bijector<br>Specifies the type of the first marginal bijector                                                                   |
| Invert First Marginal Bijector                        | model_kwargs.marginal_bijectors.0.invert<br>Indicates if the first marginal bijector should allow inversion                                                       |
| Marginal Bijector Domain Min                          | model_kwargs.marginal_bijectors.0.bijector_kwargs.domain.0<br>Lower boundary for the domain of the first marginal bijector                                        |
| Marginal Bijector Domain Max                          | model_kwargs.marginal_bijectors.0.bijector_kwargs.domain.1<br>Upper boundary for the domain of the first marginal bijector                                        |
| Marginal Bijector Extrapolation                       | model_kwargs.marginal_bijectors.0.bijector_kwargs.extrapolation<br>Defines whether to allow extrapolation in the first marginal bijector                          |
| First Marginal Bijector Parameter Constraint Function | model_kwargs.marginal_bijectors.0.parameters_constraint_fn<br>Constraint function for the parameters of the first marginal bijector                               |
| Allow Flexible Bounds for First Marginal Bijector     | model_kwargs.marginal_bijectors.0.parameters_constraint_fn_kwargs.allow_flexible_bounds<br>Defines if flexible bounds are allowed for the first marginal bijector |
| Bounds constraints for First Marginal Bijector        | model_kwargs.marginal_bijectors.0.parameters_constraint_fn_kwargs.bounds<br>Defining the constraints on the bounds for the first marginal bijector                |
| First Marginal Bijector Codomain Max                  | model_kwargs.marginal_bijectors.0.parameters_constraint_fn_kwargs.high<br>Defines the upper bound for parameters in the first marginal bijector                   |
| First Marginal Bijector Codomain Min                  | model_kwargs.marginal_bijectors.0.parameters_constraint_fn_kwargs.low<br>Defines the lower bound for parameters in the first marginal bijector                    |
| Parameters Function for First Marginal Bijector       | model_kwargs.marginal_bijectors.0.parameters_fn<br>Function for calculating parameters of the first marginal bijector                                             |
| First Marginal Bijector Parameter Shape 0             | model_kwargs.marginal_bijectors.0.parameters_fn_kwargs.parameter_shape.0<br>Defines the parameter shape dimension 0 for the first marginal bijector               |
| First Marginal Bijector Parameter Shape 1             | model_kwargs.marginal_bijectors.0.parameters_fn_kwargs.parameter_shape.1<br>Defines the parameter shape dimension 1 for the first marginal bijector               |
| Second Marginal Bijector                              | model_kwargs.marginal_bijectors.1.bijector<br>Specifies the type of second marginal bijector                                                                      |
| Invert Second Marginal Bijector                       | model_kwargs.marginal_bijectors.1.invert<br>Indicates if the second marginal bijector should allow inversion                                                      |
| Parameters Function for Second Marginal Bijector      | model_kwargs.marginal_bijectors.1.parameters_fn<br>Function for calculating parameters of the second marginal bijector                                            |
| Second Marginal Bijector Conditional Event Shape      | model_kwargs.marginal_bijectors.1.parameters_fn_kwargs.conditional_event_shape<br>Shape of the conditional events for the second marginal bijector                |
| Extrapolation for Second Marginal Bijector            | model_kwargs.marginal_bijectors.1.parameters_fn_kwargs.extrapolation<br>Defines whether to allow extrapolation in the second marginal bijector                    |
| Second Marginal Bijector Parameter Shape 0            | model_kwargs.marginal_bijectors.1.parameters_fn_kwargs.parameter_shape.0                                                                                          |

Continued on next page

| Table Name                                    | Parameter / Description                                                                                                                                                                                                                     |
|-----------------------------------------------|---------------------------------------------------------------------------------------------------------------------------------------------------------------------------------------------------------------------------------------------|
| Polynomial Order for Second Marginal Bijector | Defines the parameter shape dimension 0 for the second marginal bijector<br>model_kwargs.marginal_bijectors.1.parameters_fn_kwargs.polynomial_order<br>Defines the order of the polynomial for computations in the second marginal bijector |
| Marginal Epochs                               | fit_kwargs.0.epochs<br>Number of epochs for training the marginal distribution model                                                                                                                                                        |
| Marginal Batch Size                           | fit_kwargs.0.batch_size<br>Batch size for training the marginal distribution model                                                                                                                                                          |
| Marginal Learning Rate                        | fit_kwargs.0.learning_rate<br>Learning rate used to optimize the marginal distribution                                                                                                                                                      |
| Marginal Reduce LR on Plateau                 | fit_kwargs.0.reduce_lr_on_plateau<br>Whether to reduce learning rate on a plateau during training                                                                                                                                           |
| Marginal Early Stopping                       | fit_kwargs.0.early_stopping<br>Enables early stopping for the marginal model training                                                                                                                                                       |
| Marginal Monitor                              | fit_kwargs.0.monitor<br>Metric to monitor during training for early stopping                                                                                                                                                                |
| Marginal Verbosity                            | fit_kwargs.0.verbose<br>Verbosity mode for the marginal model training                                                                                                                                                                      |
| Joint Epochs                                  | fit_kwargs.1.epochs<br>Maximum number of epochs for training the joint distribution model                                                                                                                                                   |
| Joint Batch Size                              | fit_kwargs.1.batch_size<br>Batch size for training the joint distribution model                                                                                                                                                             |
| Joint Learning Rate Decay Steps               | fit_kwargs.1.learning_rate.scheduler_kwargs.decay_steps<br>Total number of decay steps for the learning rate scheduler of the joint model                                                                                                   |
| Joint Learning Rate Scheduler                 | fit_kwargs.1.learning_rate.scheduler_name<br>Name of the learning rate scheduler for the joint model                                                                                                                                        |
| Joint Early Stopping                          | fit_kwargs.1.early_stopping<br>Enables early stopping for the joint model training                                                                                                                                                          |
| Second Marginal Bijector Domain Min           | model_kwargs.marginal_bijectors.1.parameters_fn_kwargs.domain.0<br>Lower boundary for the domain of the second marginal bijector                                                                                                            |
| Second Marginal Bijector Domain Max           | model_kwargs.marginal_bijectors.1.parameters_fn_kwargs.domain.1<br>Upper boundary for the domain of the second marginal bijector                                                                                                            |
| JIT Compile                                   | compile_kwargs.jit_compile<br>Defines whether to compile the model using Just-In-Time compilation for performance                                                                                                                           |
| First Joint Bijector                          | model_kwargs.joint_bijectors.0.bijector<br>Specifies the first bijector type for the joint distribution                                                                                                                                     |
| Invert First Joint Bijector                   | model_kwargs.joint_bijectors.0.invert<br>Indicates if the first joint bijector should allow inversion                                                                                                                                       |

Continued on next page

| Table Name                               | Parameter / Description                                                                                                                            |
|------------------------------------------|----------------------------------------------------------------------------------------------------------------------------------------------------|
| Joint Bijector Conditional Event Shape   | model_kwargs.joint_bijectors.0.parameters_fn_kwargs.conditional_event_shape<br>Shape of the conditional events for the joint bijector              |
| Extrapolation for Joint Bijector         | model_kwargs.joint_bijectors.0.parameters_fn_kwargs.extrapolation<br>Defines whether to allow extrapolation in the joint bijector                  |
| Parameter Shape 0 for Joint Bijector     | model_kwargs.joint_bijectors.0.parameters_fn_kwargs.parameter_shape.0<br>Defines the parameter shape dimension 0 for the joint bijector            |
| Polynomial Order for Joint Bijector      | model_kwargs.joint_bijectors.0.parameters_fn_kwargs.polynomial_order<br>Defines the order of the polynomial for computations in the joint bijector |
| Joint Initial Learning Rate              | fit_kwargs.1.learning_rate.scheduler_kwargs.initial_learning_rate<br>Initial learning rate for the learning rate scheduler for the joint model     |
| Type of Joint Flow                       | model_kwargs.joint_flow_type<br>Specifies the type of flow used in the model                                                                       |
| Number of Flows                          | model_kwargs.joint_bijectors.num_layers<br>Total number of layers in the joint bijectors                                                           |
| Joint Bijector                           | model_kwargs.joint_bijectors.bijector<br>Specifies the bijector type to be used in the joint model                                                 |
| Joint Bijector Range Min                 | model_kwargs.joint_bijectors.bijector_kwargs.range_min<br>Minimum range value for the joint bijector transformation                                |
| Interval Width for Joint Bijector        | model_kwargs.joint_bijectors.parameters_constraint_fn_kwargs.interval_width<br>Specifies the interval width for constraint parameters              |
| Minimum Slope for Joint Bijector         | model_kwargs.joint_bijectors.parameters_constraint_fn_kwargs.min_slope<br>Defines the minimum slope constraint for parameters                      |
| Minimum Bin Width for Joint Bijector     | model_kwargs.joint_bijectors.parameters_constraint_fn_kwargs.min_bin_width<br>Defines the minimum bin width for the joint bijector                 |
| Number of Bins for Joint Bijector        | model_kwargs.joint_bijectors.parameters_constraint_fn_kwargs.nbins<br>Defines the number of bins used by the joint bijector                        |
| Number of Parameters for Joint Bijectors | model_kwargs.joint_bijectors.num_parameters<br>Total number of parameters in the joint bijectors                                                   |
| Activation Function for MAF              | model_kwargs.joint_bijectors.maf_parameters_fn_kwargs.activation<br>Activation function used in the neural network for MAF parameters              |
| First Hidden Units for MAF               | model_kwargs.joint_bijectors.maf_parameters_fn_kwargs.hidden_units.0<br>Number of units in the first hidden layer of the MAF                       |
| Second Hidden Units for MAF              | model_kwargs.joint_bijectors.maf_parameters_fn_kwargs.hidden_units.1<br>Number of units in the second hidden layer of the MAF                      |
| Activation Function for X0 Parameters    | model_kwargs.joint_bijectors.x0_parameters_fn_kwargs.activation<br>Activation function for x0 parameters in the joint bijector                     |
| Batch Normalization for X0 Parameters    | model_kwargs.joint_bijectors.x0_parameters_fn_kwargs.batch_norm                                                                                    |

Continued on next page

| Table Name                            | Parameter / Description                                                                                                             |
|---------------------------------------|-------------------------------------------------------------------------------------------------------------------------------------|
|                                       | Specifies if batch normalization should be applied to x0 parameters                                                                 |
| Dropout Rate for X0 Parameters        | model_kwargs.joint_bijectors.x0_parameters_fn_kwargs.dropout<br>Dropout rate for the x0 parameters neural network                   |
| First Hidden Units for X0 Network     | model_kwargs.joint_bijectors.x0_parameters_fn_kwargs.hidden_units.0<br>Number of units in the first hidden layer for x0 parameters  |
| Second Hidden Units for X0 Network    | model_kwargs.joint_bijectors.x0_parameters_fn_kwargs.hidden_units.1<br>Number of units in the second hidden layer for x0 parameters |
| Nested Bernstein Bijector Domain Min  | model_kwargs.joint_bijectors.0.parameters_fn_kwargs.domain.0<br>Lower boundary for the nested Bernstein bijector domain             |
| Nested Bernstein Bijector Domain Max  | model_kwargs.joint_bijectors.0.parameters_fn_kwargs.domain.1<br>Upper boundary for the nested Bernstein bijector domain             |
| Joint Bijector Extrapolation          | model_kwargs.joint_bijectors.bijector_kwargs.extrapolation<br>Defines whether to allow extrapolation in the joint bijector          |
| Nested Bernstein Bijector Domain Min  | model_kwargs.joint_bijectors.bijector_kwargs.domain.0<br>Lower boundary for the nested Bernstein bijector domain                    |
| Nested Bernstein Bijector Domain Max  | model_kwargs.joint_bijectors.bijector_kwargs.domain.1<br>Upper boundary for the nested Bernstein bijector domain                    |
| Invert Joint Bijector                 | model_kwargs.joint_bijectors.invert<br>Indicates if the joint bijector should be invertible                                         |
| Joint Bijector Codomain Min           | model_kwargs.joint_bijectors.parameters_constraint_fn_kwargs.low<br>Defines the lower bound for the corresponding parameters        |
| Joint Bijector Codomain Max           | model_kwargs.joint_bijectors.parameters_constraint_fn_kwargs.high<br>Defines the upper bound for the corresponding parameters       |
| Third Hidden Units for MAF            | model_kwargs.joint_bijectors.maf_parameters_fn_kwargs.hidden_units.2<br>Number of units in the third hidden layer of the MAF        |
| Is Conditional for MAF                | model_kwargs.joint_bijectors.maf_parameters_fn_kwargs.conditional<br>Indicates if the MAF parameters are conditional                |
| MAF Conditional Event Shape           | model_kwargs.joint_bijectors.maf_parameters_fn_kwargs.conditional_event_shape<br>Shape of the conditional events for the MAF        |
| Third Hidden Units for X0 Network     | model_kwargs.joint_bijectors.x0_parameters_fn_kwargs.hidden_units.2<br>Number of units in the third hidden layer for x0 parameters  |
| Is Conditional for X0 Parameters      | model_kwargs.joint_bijectors.x0_parameters_fn_kwargs.conditional<br>Indicates if the x0 parameters are conditional                  |
| X0 Parameters Conditional Event Shape | model_kwargs.joint_bijectors.x0_parameters_fn_kwargs.conditional_event_shape<br>Shape of the conditional events for x0 parameters   |

## REFERENCES

- Dillon, Joshua V. et al. (Nov. 28, 2017). *TensorFlow Distributions*. DOI: 10.48550/arXiv.1711.10604. arXiv: 1711.10604 [cs, stat]. Pre-published.
- Kingma, Diederik P. and Jimmy Ba (Jan. 29, 2017). “Adam: A Method for Stochastic Optimization.” arXiv: 1412.6980 [cs].
- Martín Abadi et al. (2015). *TensorFlow: Large-scale Machine Learning on Heterogeneous Systems*.
